# Supplementary material for: Genomic characterization of the non-O1/non-O139 Vibrio cholerae strain that caused a gastroenteritis outbreak in Santiago, Chile, 2018
Source: PubMed Central journal article supplement — Microb Genom. 2020 Feb 20;6(3):e000340. doi: 10.1099/mgen.0.000340 (PMC7200058; doi:10.1099/mgen.0.000340), 2020-02-20
Supplement: mgen-6-340-s001.pdf [file mgen-6-340-s001.pdf]

## Supplementary information

### Genomic characterization of the non-O1/non-O139 *Vibrio cholerae* strain that caused a gastroenteritis outbreak in Santiago, Chile, 2018

Mónica Arteaga<sup>1</sup>, Juliana Velasco<sup>1</sup>, Shelly Rodriguez<sup>1</sup>, Maricel Vidal<sup>2</sup>, Carolina Arellano<sup>3</sup>, Francisco Silva<sup>4</sup>, Leandro J. Carreño<sup>5,6</sup>, Roberto Vidal<sup>3,6</sup>, David A. Montero<sup>3,5</sup>  
<sup>1</sup>Servicio de Urgencia Infantil, Hospital Clínico de la Universidad de Chile “Dr. José Joaquín Aguirre”, Santiago, Chile. <sup>2</sup>Laboratorio de Salud Pública Ambiental y Laboral, Secretaría Regional Ministerial de Salud Región Metropolitana, Santiago, Chile. <sup>3</sup>Programa de Microbiología y Micología, Instituto de Ciencias Biomédicas, Facultad de Medicina, Universidad de Chile, Santiago, Chile. <sup>4</sup>Servicio de Laboratorio Clínico, Hospital Clínico de la Universidad de Chile “Dr. José Joaquín Aguirre”, Santiago, Chile. <sup>5</sup>Programa Disciplinario de Inmunología, Instituto de Ciencias Biomédicas, Facultad de Medicina, Universidad de Chile, Santiago, Chile. <sup>6</sup>Instituto Milenio de Inmunología e Inmunoterapia, Facultad de Medicina, Universidad de Chile, Santiago, Chile.

**Supplementary Table 1.** *Vibrio cholerae* genomes analyzed in this study

| Strain ID | Country     | Origin / Host | Diagnostic | No. of contigs | GenBank Accession |
|-----------|-------------|---------------|------------|----------------|-------------------|
| 5473-62   | Philippines | Human         | Diarrhea   | 94             | JID100000000      |

|             |              |              |          |     |                              |
|-------------|--------------|--------------|----------|-----|------------------------------|
| 1311-69     | India        | Human        | Diarrhea | 130 | JIDJ00000000                 |
| 1157-74     | India        | Human        | Diarrhea | 151 | JIDL00000000                 |
| HE-45       | Haiti        | Environment  | -        | 29  | ALED00000000                 |
| HC-43B1     | Haiti        | Human        | -        | 20  | ALDP00000000                 |
| HC-46B1     | Haiti        | Human        | -        | 24  | AJSL00000000                 |
| VcN1        | Bangladesh   | Environment  | -        | 178 | PDNJ00000000                 |
| 133-73      | India        | Human        | Diarrhea | 118 | JIDK00000000                 |
| 984-81      | India        | Human        | Diarrhea | 117 | JMBM00000000                 |
| 254-93      | India        | Human        | Diarrhea | 114 | JMBP00000000                 |
| HE-46       | Haiti        | Environment  | -        | 143 | MIPM00000000                 |
| HE-48       | Haiti        | Environment  | -        | 18  | AFOR00000000                 |
| HC-1A2      | Haiti        | Human        | -        | 19  | AJRO00000000                 |
| HC-2A1      | Haiti        | Human        | -        | 206 | AFOT00000000                 |
| HC-36A1     | Haiti        | Human        | -        | 17  | AXDR00000000                 |
| HC-61A2     | Haiti        | Human        | -        | 24  | AJRU00000000                 |
| HC-78A1     | Haiti        | Human        | -        | 172 | AGUZ00000000                 |
| HC-50A1     | Haiti        | Human        | -        | 254 | ALDS00000000                 |
| HC-51A1     | Haiti        | Human        | -        | 249 | ALDT00000000                 |
| HC-52A1     | Haiti        | Human        | -        | 271 | ALDU00000000                 |
| HC-55A1     | Haiti        | Human        | -        | 243 | ALDV00000000                 |
| HC-56A1     | Haiti        | Human        | -        | 217 | ALDW00000000                 |
| HC-57A1     | Haiti        | Human        | -        | 237 | ALDY00000000                 |
| G4222       | South Africa | Human        | Cholera  | 21  | ANNB01000000                 |
| NIH41       | India        | Human        | NA       | 111 | JIDH00000000                 |
| 981-75      | India        | Human        | Diarrhea | 152 | JIDM00000000                 |
| 63-93       | India        | Human        | Diarrhea | 81  | JMBN00000000                 |
| A1552       | Peru         | Human        | Cholerae | 2   | CP025936, CP025937           |
| N16961      | Bangladesh   | Human        | Cholerae | 2   | NZ_CP028827.1, NZ_CP028828.1 |
| MS6         | Thailand     | Human        | Diarrhea | 2   | AP014524, AP014525           |
| 2012EL-1759 | Haiti        | Environment  | -        | 68  | JNEW00000000                 |
| V52         | Sudan        | Human        | -        | 111 | AAKJ00000000                 |
| 1154-74     | India        | Human        | Diarrhea | 1   | CP010811                     |
| 10432-62    | Philippines  | Human        | Diarrhea | 1   | CP010812                     |
| PS15        | USA          | Environment  | -        | 131 | AJJR00000000                 |
| 8_76        | India        | Human        | Diarrhea | 82  | JIDN00000000                 |
| 1421-77     | India        | Human        | Diarrhea | 118 | JMBL00000000                 |
| 571-88      | China        | Human        | Diarrhea | 117 | JIDO00000000                 |
| 60555434    | Australia    | Human        | Dysuria  | 95  | QKWT00000000                 |
| MZO-2       | Bangladesh   | Human        | -        | 157 | MIKJ00000000                 |
| TP          | USA          | Environment  | -        | 291 | MIPK00000000                 |
| VC53        | USA          | Oyster       | -        | 247 | MIOU00000000                 |
| 1587        | Peru         | Human        | -        | 114 | AAUR00000000                 |
| 623-39      | Bangladesh   | Environment  | -        | 80  | AAWG00000000                 |
| AM-19226    | Bangladesh   | Human        | -        | 62  | AATY00000000                 |
| CT 5369-93  | Brazil       | Environment  | -        | 269 | ADAL00000000                 |
| MZO-3       | Bangladesh   | Human        | -        | 77  | AAUU00000000                 |
| RC385       | USA          | Environment  | -        | 97  | AAKH00000000                 |
| TMA21       | Brazil       | Environment  | -        | 20  | ACHY00000000                 |
| HE-25       | Haiti        | Environment  | -        | 13  | ALEC00000000                 |
| BJG-01      | USA          | NA           | -        | 311 | AFOU00000000                 |
| 234-93      | India        | Human        | Diarrhea | 129 | JMBO00000000                 |
| V51         | USA          | Human        | -        | 143 | AAKI00000000                 |
| CP1110      | USA          | Human        | Cholera  | 184 | AMWF00000000                 |
| CP1111      | USA          | Human        | Cholera  | 199 | AMWS00000000                 |
| CP1112      | USA          | Human        | Cholera  | 193 | AMWT00000000                 |
| CP1113      | USA          | Human        | Cholera  | 186 | AMWU00000000                 |
| CP1114      | USA          | Human        | Cholera  | 199 | AMWV00000000                 |
| CP1115      | USA          | Human        | Cholera  | 183 | AMWR00000000                 |
| CP1116      | USA          | Human        | Cholera  | 207 | ANNM00000000                 |
| CP1117      | USA          | Human        | Cholera  | 183 | AMWW00000000                 |
| VC48        | USA          | Oyster       | -        | 152 | MLOT00000000                 |
| 3568-07     | Mexico       | Fresh Cheese | -        | 142 | MIPL00000000                 |
| VCC19       | Brazil       | Environment  | -        | 54  | ATEV00000000                 |
| 490-93      | Thailand     | Human        | Diarrhea | 274 | JIDQ00000000                 |
| HE-09       | Haiti        | Environment  | -        | 258 | AFOP00000000                 |
| HE-16       | Haiti        | Environment  | -        | 326 | ALEB00000000                 |
| SIO         | USA          | Environment  | -        | 150 | MIPJ00000000                 |
| S12         | Australia    | Environment  | -        | 83  | MDST01000000                 |

**Supplementary Table 2.** Virulence associated genes analyzed in this study

| Virulence genes | Gene name | GenBank accession | Nucleotide positions |
|-----------------|-----------|-------------------|----------------------|
|-----------------|-----------|-------------------|----------------------|

| <b>Filamentous phage CTXΦ</b>                     |                                                        |            |                  |
|---------------------------------------------------|--------------------------------------------------------|------------|------------------|
| <i>ctxA</i>                                       | Cholera enterotoxin, A subunit                         | LT906614.1 | c1568126-1567350 |
| <i>ctxB</i>                                       | Cholera enterotoxin, B subunit                         | LT906614.1 | c1567353-1566979 |
| <i>zot</i>                                        | Zonular occludens toxin                                | LT906614.1 | c1569424-1568225 |
| <i>ace_</i>                                       | Accessory cholera enterotoxin                          | LT906614.1 | c1569702-1569409 |
| <b>Vibrio pathogenicity island-I (VPI-I)</b>      |                                                        |            |                  |
| <i>aldA</i>                                       | Aldehyde dehydrogenase                                 | LT906614.1 | 875278-876903    |
| <i>tcpA</i>                                       | Toxin-coregulated pilin                                | AF452571.1 |                  |
| <i>acfC</i>                                       | Accessory colonization factor AcfC                     | LT906614.1 | 903385-904155    |
| <b>Vibrio pathogenicity island-II (VPI-II)</b>    |                                                        |            |                  |
| <i>motB-like</i>                                  | Chemotaxis protein MotB-related protein                | LT906614.1 | c1903654-1902920 |
| <i>nanA</i>                                       | N-acetylneuraminase lyase                              | LT906614.1 | c1927114-1926218 |
| <i>nanK</i>                                       | N-acetylmannosamine kinase                             | LT906614.1 | 1930905-1931768  |
| <i>nanH</i>                                       | Neuraminidase                                          | LT906614.1 | 1933253-1935676  |
| <b>Vibrio Seventh Pandemic Island-I (VSP-I)</b>   |                                                        |            |                  |
| <i>VC0175</i>                                     | Deoxycytidylate deaminase-related protein              | LT906614.1 | c176941-175343   |
| <i>vspR</i>                                       | <i>V. cholerae</i> seventh pandemic regulator          | LT906614.1 | 177861-178424    |
| <i>VC0178</i>                                     | Patatin-related protein                                | LT906614.1 | 179338-180405    |
| <i>dncV</i>                                       | Di-nucleotide cyclase Vibrio                           | LT906614.1 | 180419-181729    |
| <b>Vibrio Seventh Pandemic Island-II (VSP-II)</b> |                                                        |            |                  |
| <i>VC0494</i>                                     | Hypothetical protein                                   | LT906614.1 | 528305-528949    |
| <i>VC0498</i>                                     | Ribonuclease HI                                        | LT906614.1 | 530684-531124    |
| <i>VC0502</i>                                     | Type IV pilin                                          | LT906614.1 | c534722-534198   |
| <i>VC0512</i>                                     | Methyl-accepting chemotaxis protein                    | LT906614.1 | 541318-542907    |
| <b>Other toxins</b>                               |                                                        |            |                  |
| <i>hlyA</i>                                       | Vibrio cholerae cytotoxin                              | LT906615.1 | 237585-239810    |
| <i>rtxA</i>                                       | MARTX (multifunctional autoprocessing RTX toxin)       | AE003852.1 | 1550108-1563784  |
| <i>chxA</i>                                       | Cholix toxin                                           | AB754476.1 |                  |
| <i>stn</i>                                        | Heat-stable enterotoxin, NAG-ST                        | M85198.1   |                  |
| <b>Other virulence associated genes</b>           |                                                        |            |                  |
| <i>toxR</i>                                       | ToxR, regulator of the expression of virulence factors | LT906614.1 | c1047905-1047185 |
| <i>mshA</i>                                       | Mannose-sensitive hemagglutinin (MSHA), a type 4 pilus | LT906614.1 | 435450-435986    |
| <i>ompU</i>                                       | Outer membrane protein U                               | KF434513.1 |                  |
| <i>ompW</i>                                       | Outer membrane protein W                               | LT906615.1 | c820096-819681   |
| <b>Type III secretion system (T3SS)</b>           |                                                        |            |                  |
| <i>vcsN2</i>                                      | Type III secretion cytoplasmic ATPase                  | CP010812.1 | c2624653-2623391 |
| <i>vcsC2</i>                                      | Type II/III secretion system protein                   | CP010812.1 | c2626110-2624653 |
| <i>vcsV2</i>                                      | Type III secretion protein                             | CP010812.1 | c2635653-2633770 |
| <i>vspD</i>                                       | Putative secreted protein D                            | CP010812.1 | c2644010-2642961 |
| <i>tdh2</i>                                       | Thermostable direct hemolysin 2                        | CP010812.1 | 2659186-2659728  |
| <b>Type VI secretion system (T6SS)</b>            |                                                        |            |                  |
| <i>vgrG-1</i>                                     | Valine-glycine repeat protein G 1                      | LT906614.1 | 1510289-1513780  |
| <i>vgrG-2</i>                                     | Valine-glycine repeat protein G 2                      | LT906615.1 | 20426-22510      |
| <i>vgrG-3</i>                                     | Valine-glycine repeat protein G 3                      | LT906615.1 | 137579-140632    |
| <i>vgrG-4</i>                                     | Valine-glycine repeat protein G 4                      | KU722393.1 | 13902-15878      |
| <i>hcp</i>                                        | Hemolysin coregulated protein                          | LT906614.1 | 1509643-1510161  |

**Supplementary Table 3.** Open reading frames localized within GIVch-T6SS<sup>Santiago-089</sup> (GenBank accession: SRLP00000000)

| ORF# | Position (bp) *  | Denomination in transposable element      | Closest informative protein match                     | Identities      | Accession No. of homologue | Function to closest related protein. Comments                                |
|------|------------------|-------------------------------------------|-------------------------------------------------------|-----------------|----------------------------|------------------------------------------------------------------------------|
|      | 1 - 367          | ssrA tmRNA                                |                                                       |                 |                            |                                                                              |
| 1    | 534 – 1,772      | Integrase                                 | Tyrosine-type recombinase/integrase                   | 411/412 (99%)   | WP_032480643.1             | DNA mobility                                                                 |
|      | c2,129 – 5,276   | CRISPR with 53 repeat units repeat region |                                                       |                 |                            |                                                                              |
| 2    | c5,432 – 6,070   | cas6                                      | Type I-F CRISPR-associated endoribonuclease Cas6/Csy4 | 211/212 (99%)   | WP_142735065.1             | CRISPR-Cas system                                                            |
| 3    | c6,080 – 7,111   | csy3                                      | Type I-F CRISPR-associated protein Csy3               | 343/343 (100%)  | WP_142576943.1             | CRISPR-Cas system                                                            |
| 4    | c7,123 – 8,010   | csy2                                      | Type I-F CRISPR-associated protein Csy2               | 295/295 (100%)  | WP_142735064.1             | CRISPR-Cas system                                                            |
| 5    | c8,007 – 9,284   | csy1                                      | Type I-F CRISPR-associated protein Csy1               | 425/425 (100%)  | WP_142735063.1             | CRISPR-Cas system                                                            |
| 6    | c9,284 – 12,652  | cas3                                      | Type I-F CRISPR-associated helicase Cas3              | 1120/1122 (99%) | WP_071192023.1             | CRISPR-Cas system                                                            |
| 7    | c12,649 – 13,638 | cas1                                      | Type I-F CRISPR-associated endonuclease Cas1          | 327/329 (99%)   | WP_119788720.1             | CRISPR-Cas system                                                            |
| 8    | c13,753 – 14,547 | Hypothetical protein                      | WYL domain-containing protein                         | 264/264 (100%)  | WP_000880612.1             | Predicted DNA-binding transcriptional regulator contains HTH and WYL domains |
| 9    | 14,963 – 15,481  | <i>hcp</i>                                | Hcp family type VI secretion system effector          | 172/172 (100%)  | WP_001142919.1             | Type VI secretion system effector                                            |
| 10   | 15,608 – 17,584  | <i>vgrG-4</i>                             | VgrG-2 protein                                        | 428/620 (69%)   | WP_000212125.1             | Type VI secretion system effector                                            |
| 11   | 17,584 – 18,372  | Hypothetical protein                      | DUF4123 domain-containing protein                     | 260/262(99%)    | WP_033932339.1             | Domain of unknown function (DUF4123)                                         |
| 12   | 18,362 – 18,670  | Hypothetical protein                      | Hypothetical protein                                  | 98/98 (100%)    | WP_142735597.1             | Unknown                                                                      |

\* c: indicates ORFs transcribed on the complementary strand.

**Supplementary Table 4.** Open reading frames localized within GIVch-MDR<sup>Santiago-089</sup> (GenBank accession: SRLP00000000)

| ORF# | Position (bp) *                 | Denomination in transposable element         | Closest informative protein match                           | Identities       | Accession No. of homologue | Function to closest related protein. Comments |
|------|---------------------------------|----------------------------------------------|-------------------------------------------------------------|------------------|----------------------------|-----------------------------------------------|
|      | trmE gene                       |                                              |                                                             |                  |                            |                                               |
| 1    | 1 – 1,170                       | Int-xerC                                     | Site-specific integrase                                     | 385/389 (99%)    | WP_000703233.1             | DNA mobility                                  |
| 2    | c1,414 – 1,758                  | Hypothetical protein                         | Helix-turn-helix domain-containing protein                  | 114/114 (100%)   | WP_063108740.1             | Predicted transcriptional regulator           |
| 3    | c1,818 – 3,488                  | Hypothetical protein                         | DUF927 domain-containing protein                            | 555/556 (99%)    | WP_095482111.1             | Domain of unknown function (DUF927)           |
| 4    | 4,226 – 4,903                   | Hypothetical protein                         | Hypothetical protein                                        | 224/224 (100%)   | WP_032478679.1             | Unknown                                       |
| 5    | c4,961 – 5,995                  | Hypothetical protein                         | Virulence RhuM family protein                               | 337/344 (98%)    | WP_023135447.1             | Unknown                                       |
| 6    | c6,006 – 6,476                  | Toxin-Antitoxin gene                         | Type II toxin-antitoxin system death-on-curing family toxin | 156/156 (100%)   | WP_023135448.1             | Toxin-antitoxin system                        |
| DR   | 6,228- 6,242<br>28,579 – 28,593 | AGC - -GCCAGTGAAGAGCG<br>AGCCCGCCAGTGAAGAGCG |                                                             |                  |                            |                                               |
| 7    | c6,478 – 7,491                  | Hypothetical protein                         | DNA-binding protein                                         | 337/337 (100%)   | EBV0095603.1               | Unknown                                       |
| 8    | c7,484 – 10,729                 | <i>hsdR</i>                                  | Type I restriction endonuclease subunit R                   | 1081/1081 (100%) | EBV0095602.1               | Type I restriction-modification enzymes       |
| 9    | c10,729 – 12,018                | <i>hsdS</i>                                  | Restriction endonuclease subunit S                          | 429/429 (100%)   | EBV0095601.1               | Type I restriction-modification enzymes       |
| 10   | c12,015 – 13,997                | <i>hsdM</i>                                  | SAM-dependent DNA methyltransferase                         | 660/660(100%)    | EBV0095600.1               | Type I restriction-modification enzymes       |
| 11   | c14,061 – 14,558                | Toxin-Antitoxin gene                         | Addiction module antitoxin                                  | 165/165 (100%)   | EBV0095599.1               | Toxin-antitoxin system                        |
| 12   | c14,708 – 15,331                | Resolvase                                    | Resolvase                                                   | 206/207 (99%)    | WP_006811352.1             | DNA mobility                                  |
| 13   | c15,601 – 16,365                | IS6100                                       | IS6-like element IS6100 family transposase                  | 254/254 (100%)   | WP_077191101.1             | DNA mobility                                  |
| 14   | c16,900 – 17,394                | Hypothetical protein                         | Hypothetical protein                                        | 164/164 (100%)   | AFI96177.1                 | Unknown                                       |
| 15   | c17,500 – 18,339                | <i>sul1</i>                                  | Sulfonamide-resistant dihydropteroate synthase Sul1         | 279/279 (100%)   | WP_000451390.1             | Resistance to sulfonamide                     |
| 16   | c18,333 – 18,680                | <i>emrE</i>                                  | Ethidium bromide-methyl viologen resistance protein EmrE    | 115/115 (100%)   | WP_053764310.1             | Putative drug-resistant associated gene       |
| 17   | c18,881 – 19,354                | <i>dfrA15</i>                                | Trimethoprim-resistant dihydrofolate reductase DfrA15       | 157/157 (100%)   | WP_001355915.1             | Resistance to trimethoprim                    |
| 18   | 19,511 – 20,524                 | Int-xerD                                     | Class 1 integron integrase IntI1                            | 337/337 (100%)   | WP_000845048.1             | DNA mobility                                  |
| 19   | 20,939 – 22,621                 | <i>tniA</i>                                  | TniA                                                        | 559/560 (99%)    | AJD77018.1                 | DNA mobility                                  |
| 20   | 22,624 – 23,532                 | <i>tniB</i>                                  | AAA family ATPase                                           | 302/302 (100%)   | WP_000393453.1             | DNA mobility                                  |
| 21   | 23,529 – 24,746                 | <i>tniQ</i>                                  | TniQ family protein                                         | 405/405(100%)    | WP_000801210.1             | DNA mobility                                  |

|    |                  |                      |                                                            |                |                |                    |
|----|------------------|----------------------|------------------------------------------------------------|----------------|----------------|--------------------|
| 22 | 24,807 – 25,421  | <i>tniR</i>          | Recombinase family protein                                 | 204/204 (100%) | WP_000904941.1 | DNA mobility       |
| 23 | c25,474 – 25,710 | <i>merE</i>          | Broad-spectrum mercury transporter MerE                    | 78/78 (100%)   | WP_001087809.1 | Mercury resistance |
| 24 | c25,707 – 26,072 | <i>merD</i>          | Mercury resistance co-regulator MerD                       | 121/121 (100%) | WP_003465059.1 | Mercury resistance |
| 25 | c26,089 – 27,735 | <i>merA</i>          | Mercury (II) reductase                                     | 548/548 (100%) | WP_092230857.1 | Mercury resistance |
| 26 | c27,732 – 27,977 | <i>merF</i>          | Mercury resistance system transport protein MerF           | 81/81 (100%)   | WP_000654684.1 | Mercury resistance |
| 27 | c27,980 – 28,255 | <i>merP</i>          | Mercury resistance system periplasmic binding protein MerP | 91/91 (100%)   | WP_000735441.1 | Mercury resistance |
| 28 | c28,271 – 28,621 | <i>merT</i>          | Mercuric ion transporter MerT                              | 116/116 (100%) | WP_001294667.1 | Mercury resistance |
| 29 | c28,693 – 29,145 | <i>merR</i>          | Hg(II)-responsive transcriptional regulator                | 144/144 (100%) | WP_000429838.1 | Mercury resistance |
| 30 | c29,156 – 29,605 | Hypothetical protein | Hypothetical protein                                       | 146/149 (98%)  | WP_001965932.1 | Unknown            |
| 31 | c29,583 – 29,744 | Hypothetical protein | Hypothetical protein                                       | 53/53 (100%)   | EKL05168.1     | Unknown            |
| 32 | c29,731 – 30,162 | Hypothetical protein | Hypothetical protein                                       | 143/143 (100%) | WP_000834463.1 | Unknown            |
| 33 | c30,159 – 31,001 | Hypothetical protein | Hypothetical protein                                       | 279/280 (99%)  | WP_001971006.1 | Unknown            |

\* c: indicates ORFs transcribed on the complementary strand.

### Clustal Omega Alignment of the GyrA protein of the Santiago and N16961 strains

|               |                                                                         |     |
|---------------|-------------------------------------------------------------------------|-----|
| GyrA_Santiago | MSDLAKEITPVNIEDELRSYLDYAMSVIVGRALPDVRDGLKPVHRRVLFAMNVLGNDWN             | 60  |
| GyrA_N16961   | MSDLAKEITPVNIEDELRSYLDYAMSVIVGRALPDVRDGLKPVHRRVLFAMNVLGNDWN<br>*****    | 60  |
| GyrA_Santiago | KAYKKSARVVGDVIGKYHPHGDIAVYDITVRMAQPFSLRYMLVDGQGNFGSIDGDSAAAM            | 120 |
| GyrA_N16961   | KAYKKSARVVGDVIGKYHPHGDIAVYDITVRMAQPFSLRYMLVDGQGNFGSIDGDSAAAM<br>*****   | 120 |
| GyrA_Santiago | RYTEVRMSKIAHELLADLDKETVDYVYPNYDGTQIPAVLPTKIPNLLINGS;SGIAVGMAT           | 180 |
| GyrA_N16961   | RYTEVRMSKIAHELLADLDKETVDYVYPNYDGTQIPAVLPTKIPNLLINGS;SGIAVGMAT<br>*****  | 180 |
| GyrA_Santiago | NIPPHNLGEVIDGCLAYIDNEAITIDELMDYIPGPDFPTAALISGRKGIIDAYKTGRGKV            | 240 |
| GyrA_N16961   | NIPPHNLGEVIDGCLAYIDNEAITIDELMDYIPGPDFPTAALISGRKGIIDAYKTGRGKV<br>*****   | 240 |
| GyrA_Santiago | YMRKAEIETDKNGKETIIVSEIPYQVNKARLIEKIAELVKEKKVEGISALRDESDKDGGM            | 300 |
| GyrA_N16961   | YMRKAEIETDKNGKETIIVSEIPYQVNKARLIEKIAELVKEKKVEGISALRDESDKDGGM<br>*****   | 300 |
| GyrA_Santiago | RIVIECKRDVAVGEVVLNLYANTQLQTTFGINMVALDNGQPKLFNLKEMLKCFVDHRRREV           | 360 |
| GyrA_N16961   | RIVIECKRDVAVGEVVLNLYANTQLQTTFGINMVALDNGQPKLFNLKEMLKCFVDHRRREV<br>*****  | 360 |
| GyrA_Santiago | VTRRTIFELRKARERAHILEGLALANIDEIIEELIRRAATPAEAKEGLIARGWDLGNVA             | 420 |
| GyrA_N16961   | VTRRTIFELRKARERAHILEGLALANIDEIIEELIRRAATPAEAKEGLIARGWDLGNVA<br>*****    | 420 |
| GyrA_Santiago | AMLERAGTDAARPEWLEPQYGIIRDGKYFLTEQQAQAILDLRLHKLTLGLEHEKILDEYKQL          | 480 |
| GyrA_N16961   | AMLERAGTDAARPEWLEPQYGIIRDGKYFLTEQQAQAILDLRLHKLTLGLEHEKILDEYKQL<br>***** | 480 |
| GyrA_Santiago | LEEIAALMHILASTERLMEVIREELEAIRAGFSDARRTEITAATHDIDMEELIAREDDVVV           | 540 |
| GyrA_N16961   | LEEIAALMHILASTERLMEVIREELEAIRAGFSDARRTEITAATHDIDMEELIAREDDVVV<br>*****  | 540 |
| GyrA_Santiago | TLSEHYVKYQLLSDYEAQRGGGKGSATKMKKEEDYIERLLVANTHDNILLFSTRGKTYR             | 600 |
| GyrA_N16961   | TLSEHYVKYQLLSDYEAQRGGGKGSATKMKKEEDYIERLLVANTHDNILLFSTRGKTYR<br>*****    | 600 |
| GyrA_Santiago | MKVYQLPLASRTARGKPIVNLPLEENERITAILPVTEFSEDKFIFMATGDGTVKKTSLD             | 660 |
| GyrA_N16961   | MKVYQLPLASRTARGKPIVNLPLEENERITAILPVTEFSEDKFIFMATGDGTVKKTSLD<br>*****    | 660 |
| GyrA_Santiago | QFANVRANGLIALNLRDEDSLIGVDITDGESEIMLFSKFGKVVRFKESEETAVVDENGQP            | 720 |
| GyrA_N16961   | QFANVRANGLIALNLRDEDSLIGVDITDGESEIMLFSKFGKVVRFKESEETAVVDENGQP            | 720 |

```

*****
GyrA_Santiago      VLDENGGQPEIKFKGVRPMGRTAAGVRGMKLADGDQVVSIVPKTEGDVLTVTENGYGKRT      780
GyrA_N16961       VLDENGGQPEIKFKGVRPMGRTAAGVRGMKLADGDQVVSIVPKTEGDVLTVTENGYGKRT      780
*****

GyrA_Santiago      SLSEYPTKGRGTQGVVSIKVSERNGSVVGAVQVAEGDEFMMITNAGTLVRRTRVAEVSQVG      840
GyrA_N16961       SLSEYPTKGRGTQGVVSIKVSERNGSVVGAVQVAEGDEFMMITNAGTLVRRTRVAEVSQVG      840
*****

GyrA_Santiago      RNTQGVTLIRTSEGESVVGLQRIDEIEESELPEGEEALVENDAPVAQDDDDGEQE      894
GyrA_N16961       RNTQGVTLIRTSEGESVVGLQRIDEIEESELPEGEEALVENDAPVAQDDDDGEQE      894
*****

```
